# Supplementary material for: Synthesis of efficient near-infrared-emitting CuInS2/ZnS quantum dots by inhibiting cation-exchange for bio application
Source: Royal Society of Chemistry journal article supplement (doi:10.1039/c6ra27045j), 2017-01-01
Supplement: c6ra27045j1.pdf [file c6ra27045j1.pdf]

## Electronic Supplementary Information

### Synthesis of efficient near-infrared-emitting CuInS<sub>2</sub>/ZnS quantum dots by inhibiting cation-exchange for bio application

*Yi su Kim, Yonghee Lee, Youngsun Kim, Donghyuk Kim, Hyung Seok Choi, Jae Chul Park, Yoon Sung Nam\**, and *Duk Young Jeon\**

Department of Materials Science and Engineering, Korea Advanced Institute of Science and Technology, 291 Daehak-ro, Yuseong-gu, Daejeon 305–338, Republic of Korea

\* E-mail: [dyjeon@kaist.ac.kr](mailto:dyjeon@kaist.ac.kr) , \* E-mail: [yoonsung@kaist.ac.kr](mailto:yoonsung@kaist.ac.kr)

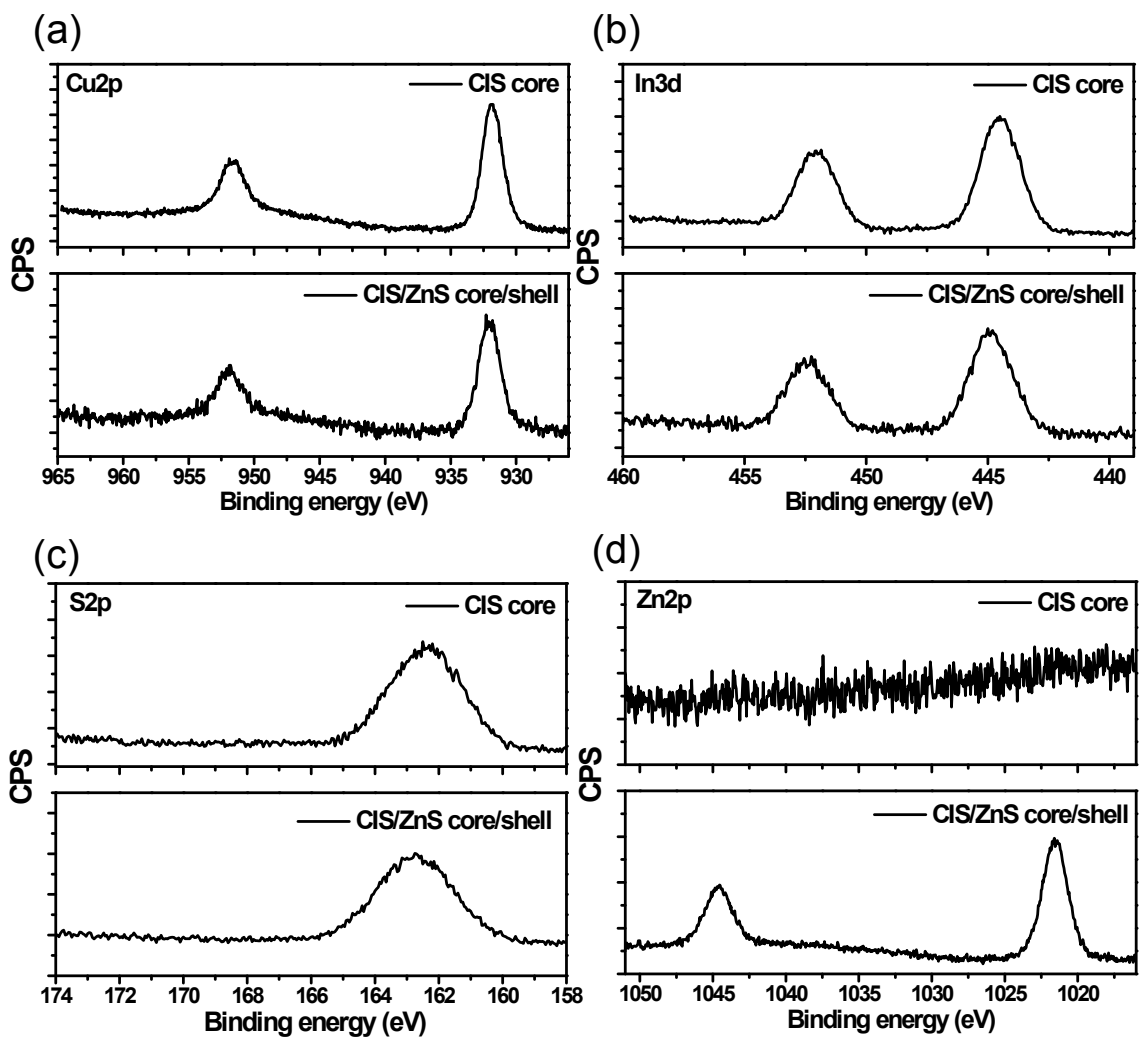

Fig S1. XPS elemental analysis of Cu, In, S, and Zn for CIS core and CIS/ZnS core/shell QDs.

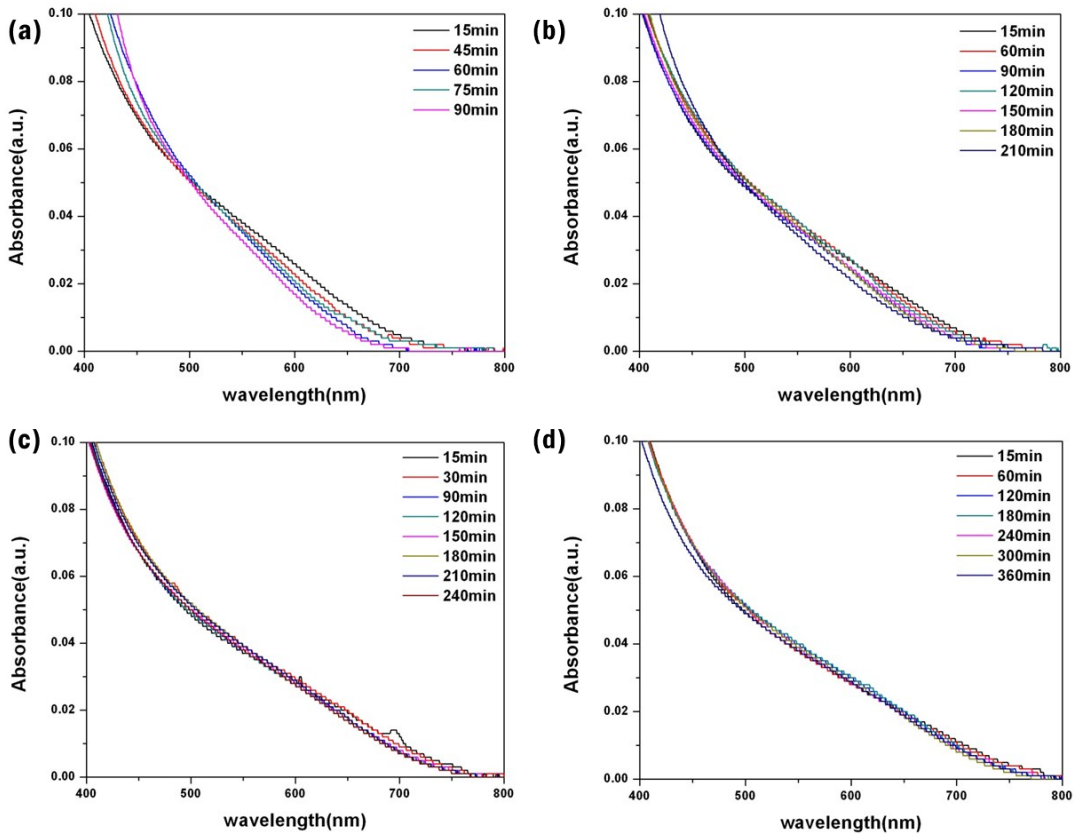

Fig. S2. The temporal evolution of absorption spectra of CIS/ZnS QDs synthesized at (a) 250 °C, (b) 230 °C, (c) 210 °C, and (d) 180 °C, respectively. More blue-shift was observed at 250 °C, which is the highest temperature.

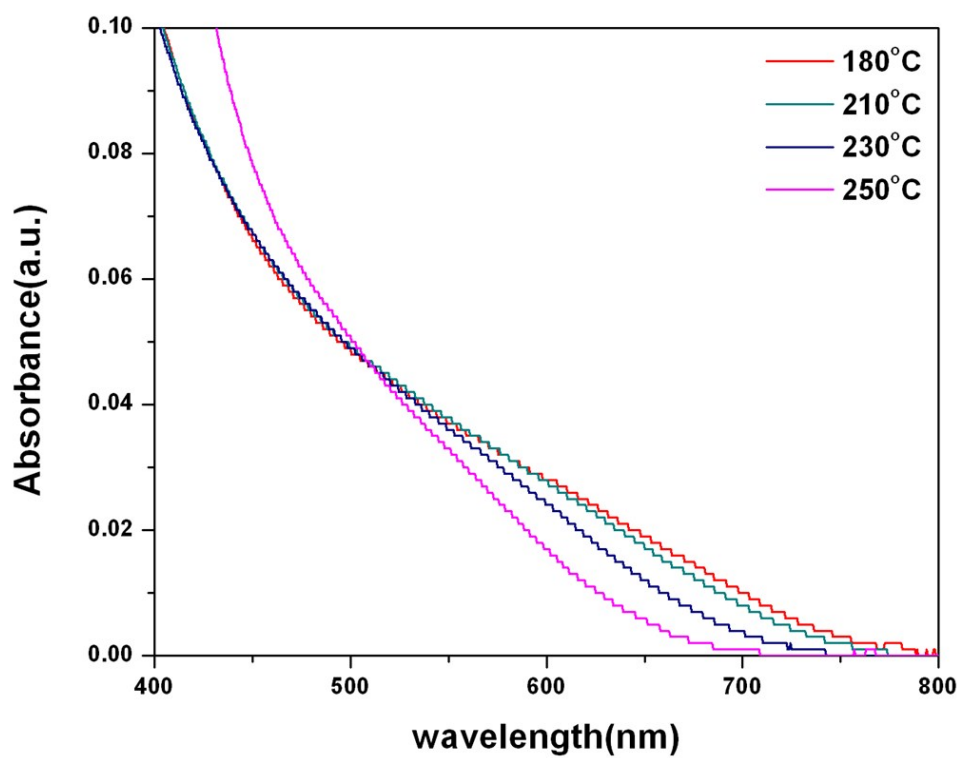

Fig. S3. Comparison of the absorption spectra between four samples prepared for with the same duration of ZnS shell synthesis. More blue-shift was observed at 250°C, which is the highest temperature.

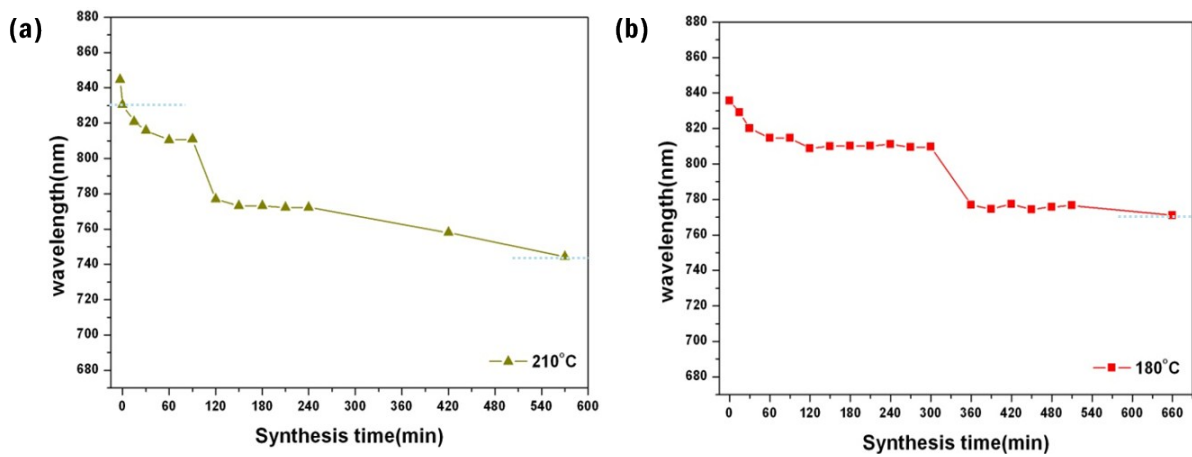

Fig. S4 The blue-shifted emission wavelength as a function of synthesis time at relatively low temperature. (a) 210°C and (b)180°C. Even with long duration time, there is no PL spectra degradation.

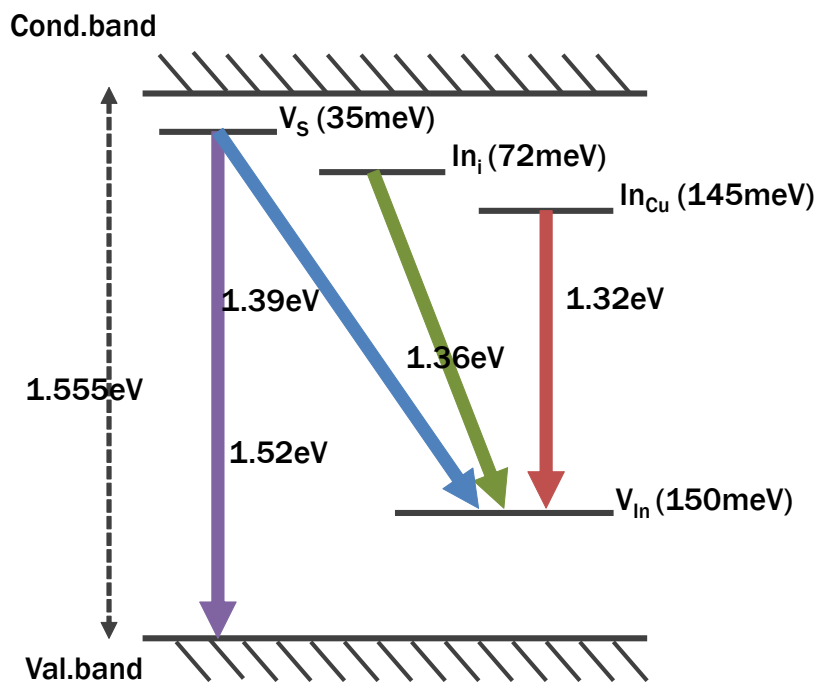

Fig. S5 The proposed energy level diagram of Cu-rich CIS-based QDs.

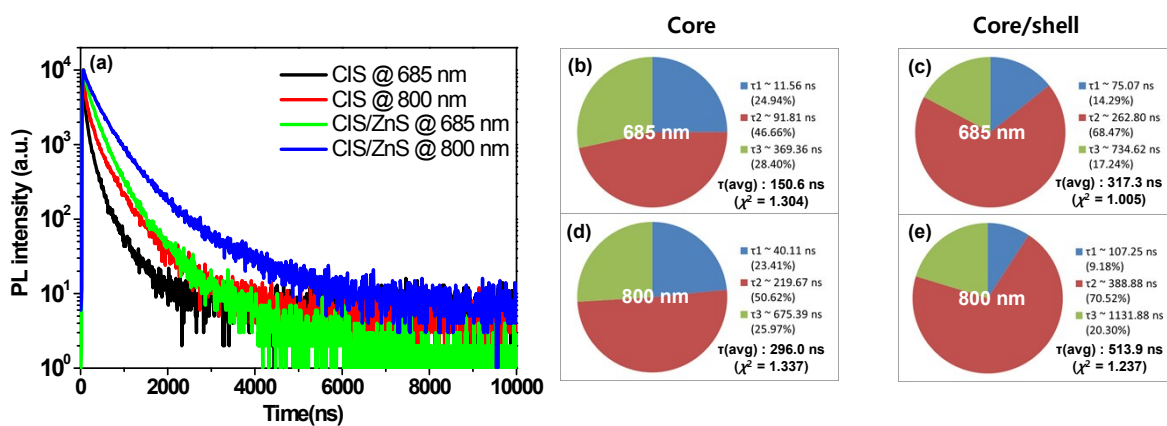

Fig. S6 (a) PL decay curves of CIS and CIS/ZnS QDs measured at 685 and 800 nm. The exponential PL decay components of (b) CIS QDs and (c) CIS/ZnS QDs measured at 685 nm, (d) CIS QDs, (e) CIS/ZnS QDs measured at 800 nm.

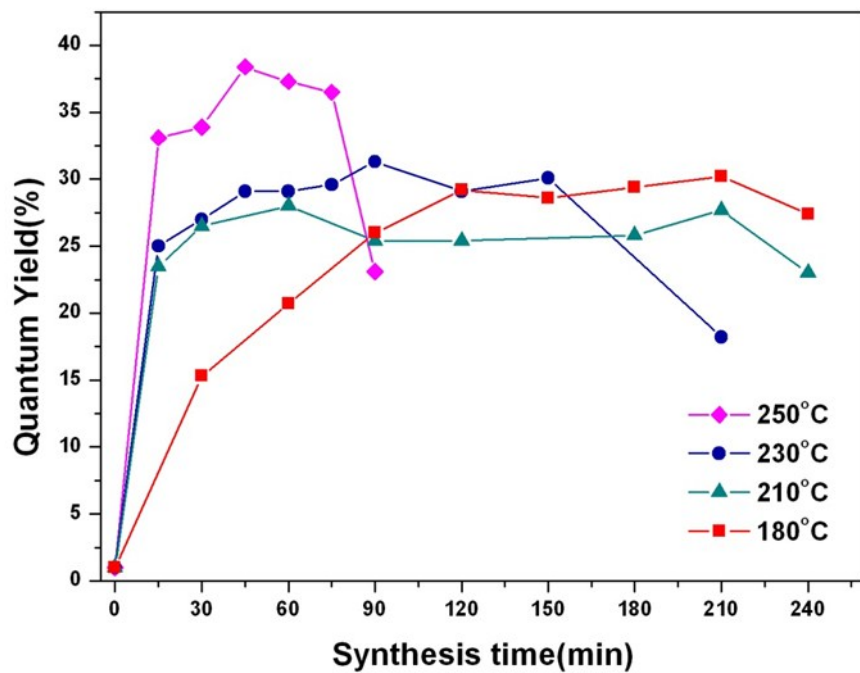

Fig. S7 The enhancement of QY as a function of duration of ZnS shell synthesis. The saturated QY of each case is as follows: 180°C: 28%, 210°C: 26%, 230°C: 30%, and 250°C: 36%



| <b>Atomic %</b>           | <b>Cu</b>   | <b>In</b>   | <b>S</b>    | <b>Zn</b>  |
|---------------------------|-------------|-------------|-------------|------------|
| <b>CIS core</b>           | <b>26.7</b> | <b>21.9</b> | <b>51.4</b> | <b>0</b>   |
| <b>CIS/ZnS core/shell</b> | <b>7.9</b>  | <b>5.2</b>  | <b>78.2</b> | <b>8.7</b> |

Tab. S1 XPS composition analysis of CIS core and CIS/ZnS core/shell QDs.
